# Supplementary figures and images for: The effect of reduced street lighting on road casualties and crime in England and Wales: controlled interrupted time series analysis
Source: HighWire-hosted journal article supplement (doi:10.1136/jech-2015-206012), 2015-07-28

# Collisions (casualties killed or seriously injured)

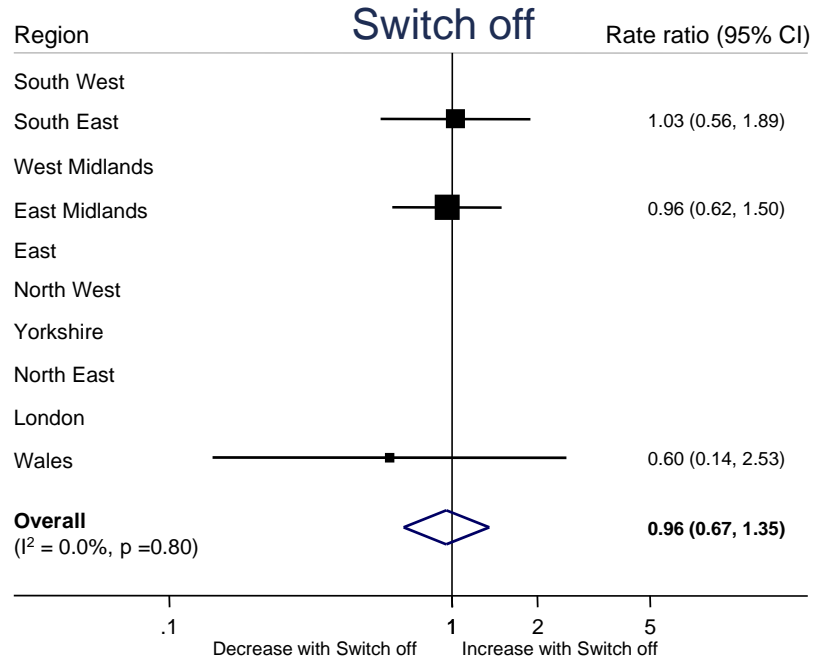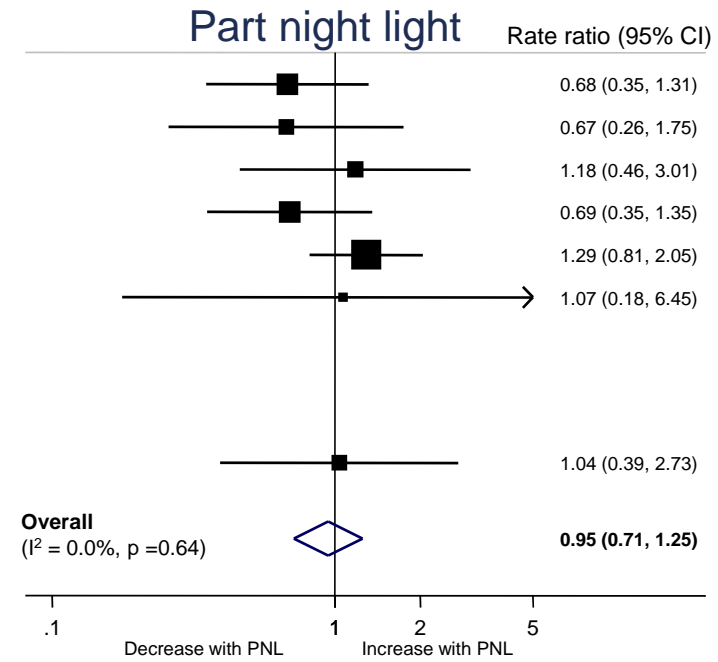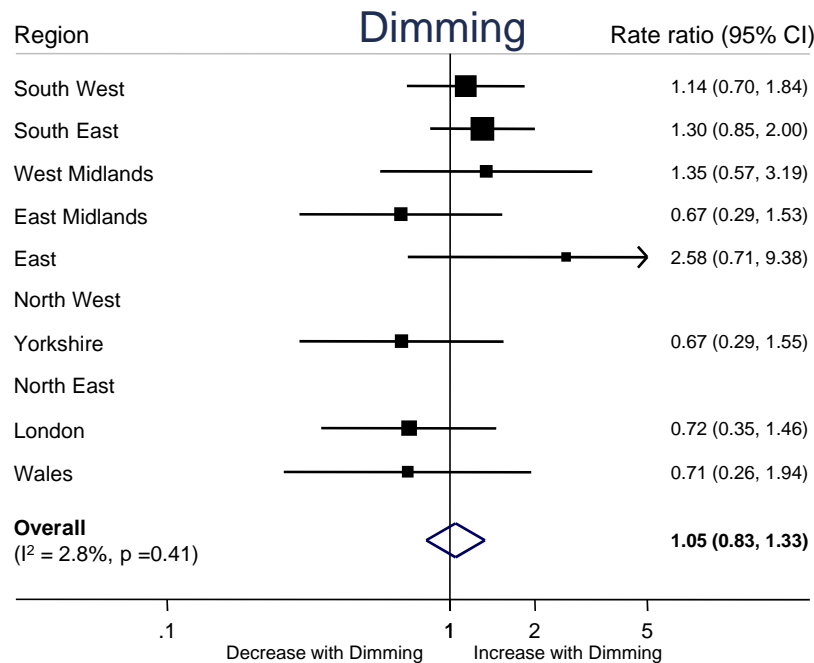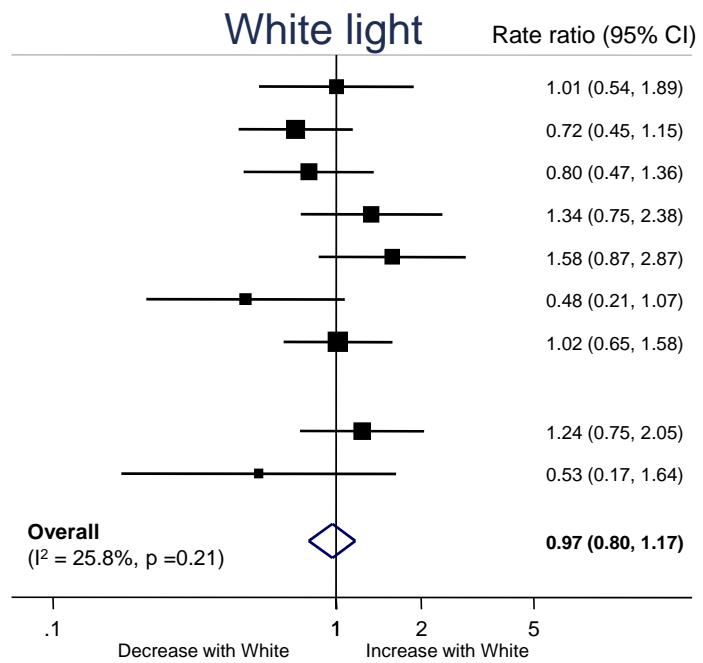

Supplement: jech-2015-206012supp_Appendix2.pdf [file jech-2015-206012supp_Appendix2.pdf]
